# Supplementary material for: Consensus Management of Gastrointestinal Events Associated with Delayed-Release Dimethyl Fumarate: A Delphi Study
Source: Springer Nature journal article supplement (doi:10.1007/s40120-015-0037-x), 2015-11-02

## ELECTRONIC SUPPLEMENTARY MATERIAL

**Table S1. Clinician demographics.**

| <b>Characteristic, <i>n</i> (%)</b>      | <b>Respondents<br/>(<i>N</i> = 64)</b> |
|------------------------------------------|----------------------------------------|
| Country of practice                      |                                        |
| United States                            | 56 (87.5)                              |
| Canada                                   | 8 (12.5)                               |
| Role                                     |                                        |
| Physician                                | 51 (79.7)                              |
| Nurse practitioner                       | 9 (14.1)                               |
| Physician assistant                      | 3 (4.7)                                |
| Nurse                                    | 1 (1.6)                                |
| Practice setting                         |                                        |
| Free-standing private clinic             | 24 (37.5)                              |
| Academic hospital based                  | 22 (34.4)                              |
| Community hospital based                 | 14 (21.9)                              |
| Managed care clinic                      | 1 (1.6)                                |
| Other                                    | 3 (4.7)                                |
| No. of patients with MS in practice      |                                        |
| Total from all practices <sup>a</sup>    | 79,570                                 |
| Median (range) per practice <sup>a</sup> | 1000 (45–5000)                         |
| Length of time treating patients with MS |                                        |
| >10 years                                | 46 (71.9)                              |
| >5 to ≤10 years                          | 14 (21.9)                              |
| >1 to ≤5 years                           | 4 (6.3)                                |

<sup>a</sup>In instances where respondents from the same practice entered different numbers, only the lower number was counted; where respondents entered an annual number, that number was used for the total.

*MS* Multiple sclerosis.

**Fig. S1 Structure of the (a) first and (b) second questionnaires.** <sup>a</sup>DMF, delayed-release dimethyl fumarate (also known as gastro-resistant DMF). <sup>b</sup>Severe symptoms defined as those causing severe discomfort and/or causing incapacitation or significant impact on the patient's daily life; severity may cause cessation of treatment; treatment for symptoms may be given and/or the patient may be hospitalized.

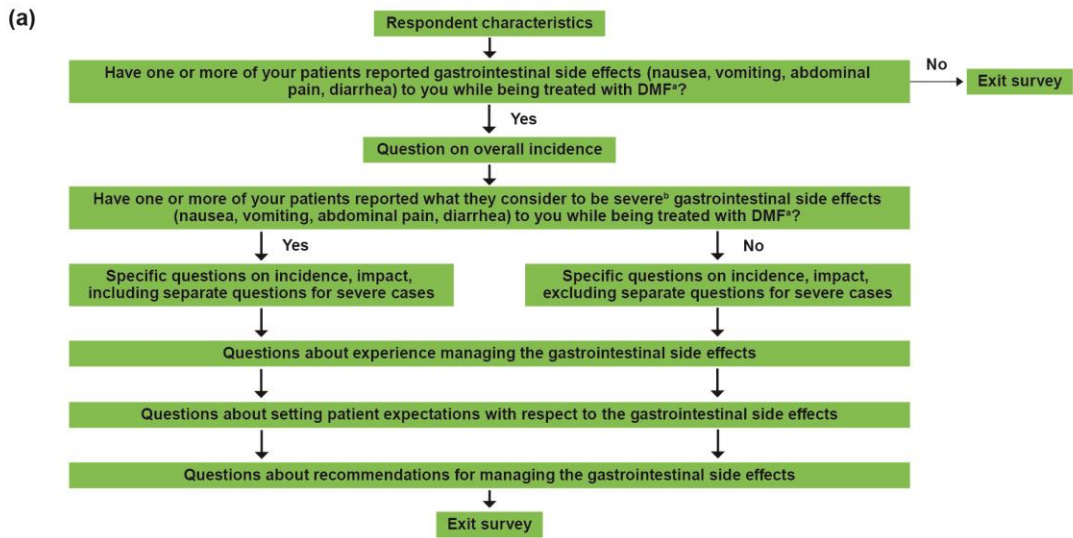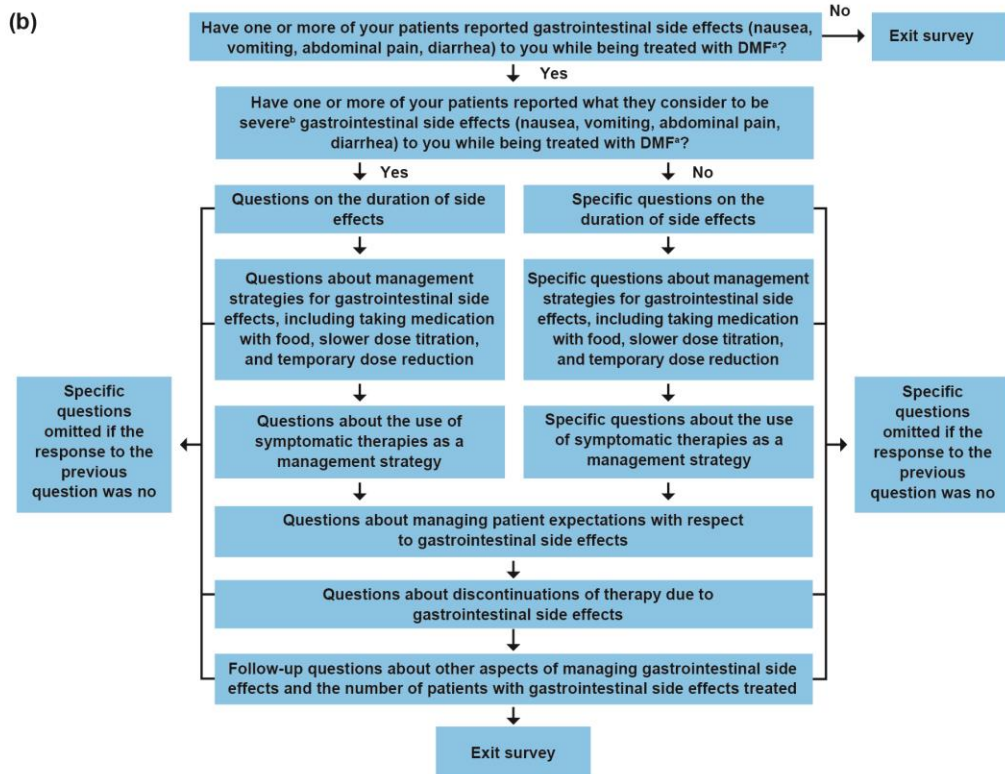

**Fig. S2 Duration of (a) mild to moderate and (b) severe gastrointestinal (GI) adverse events (AEs).** Note: for the options ‘Don’t know’ or ‘No experience,’ respondents could only answer 100% or not provide an entry. <sup>a</sup>Variable: timing unrelated to dose. <sup>b</sup>Continuous: AE persists to next dose.

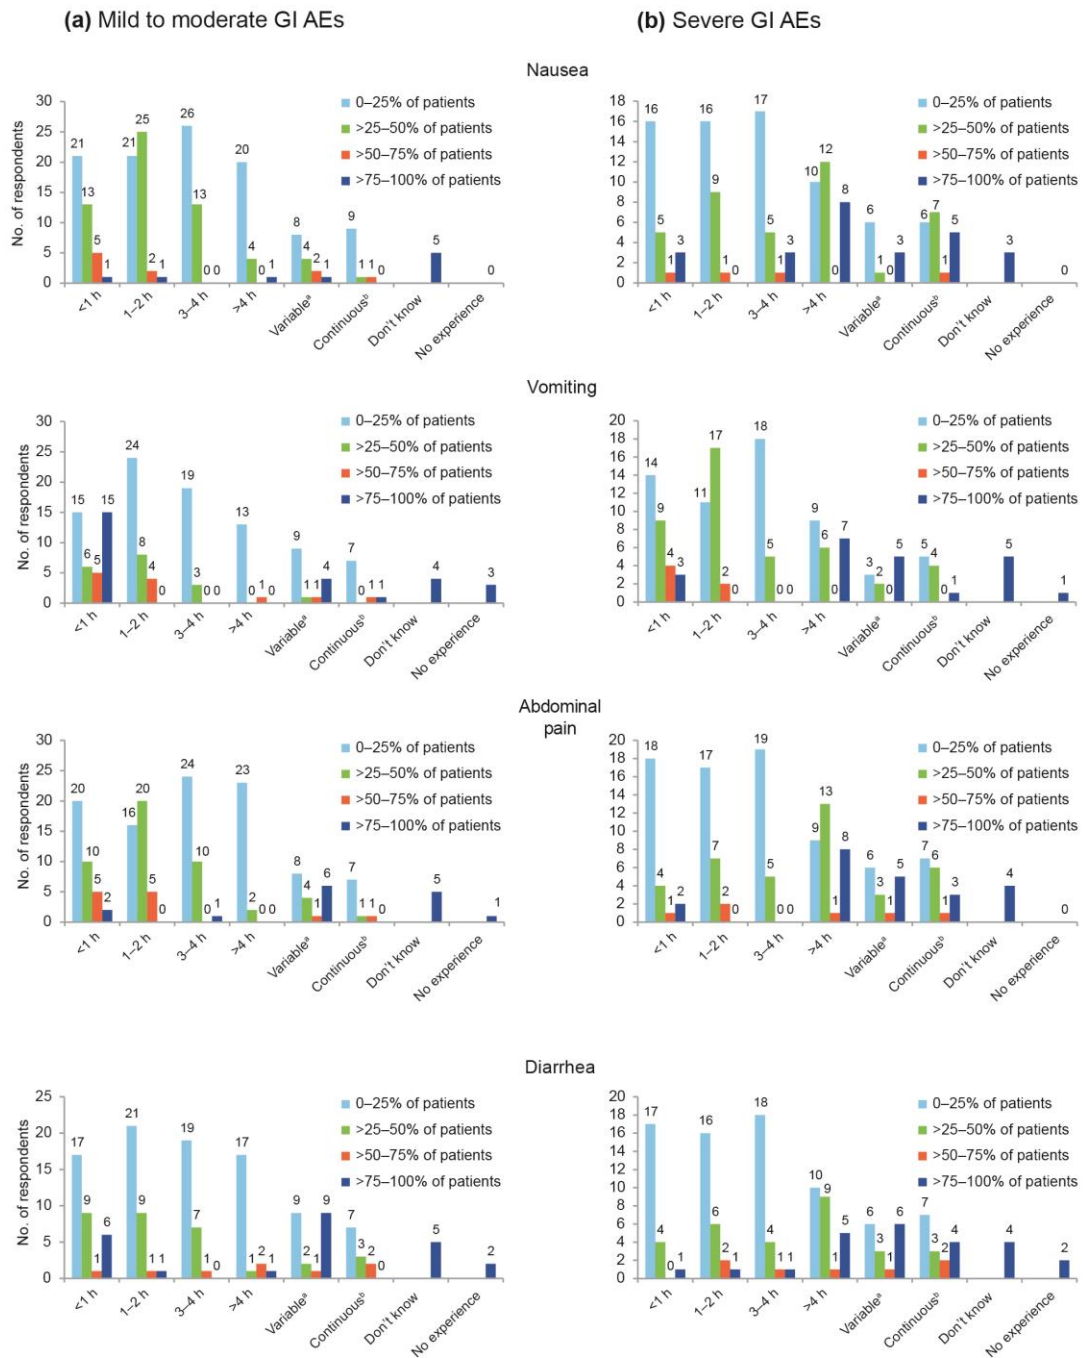

**Fig. S3 Specific food-based strategies of respondents when managing (a) all patients (typical and severe cases); (b) typical cases; and (c) severe cases when asked the question, “Which type of food(s) do you most frequently recommend as a management strategy in patients with mild to moderate GI side effects? (You may select >1).”**

<sup>a</sup>Question posed only to respondents with both typical patients and severe cases who reported food-based strategies as helpful ( $n = 51$ ). <sup>b</sup>Question posed to all respondents who reported food-based strategies as helpful ( $n = 55$ ). <sup>c</sup>Question posed only to respondents who recommend food-based strategies for severe cases ( $n = 52$ ). *AE* Adverse event, *GI* Gastrointestinal.

**(a) All patients with GI AEs<sup>a</sup>**

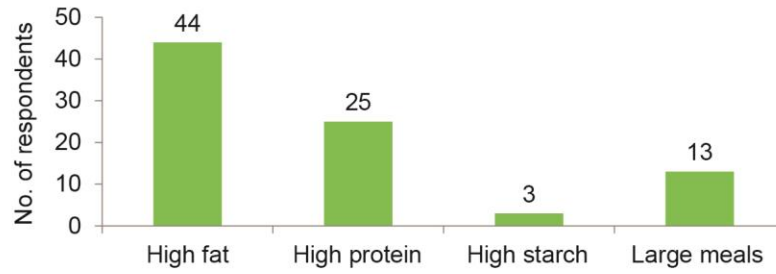

**(b) Typical cases<sup>b</sup>**

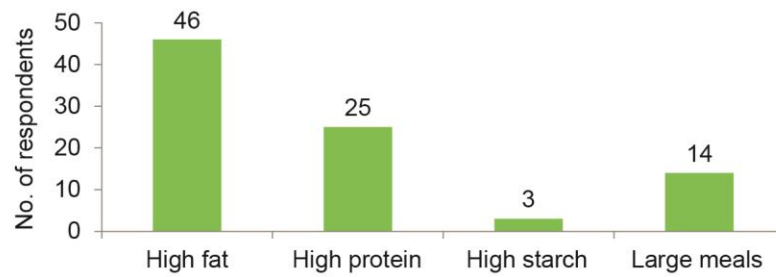

**(c) Severe cases<sup>c</sup>**

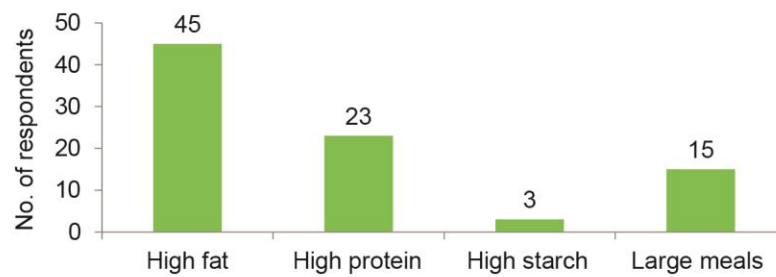

**Fig. S4 Recommended duration and factors involved with a temporary dosage reduction of delayed-release dimethyl fumarate in typical and severe cases. GI Gastrointestinal.**

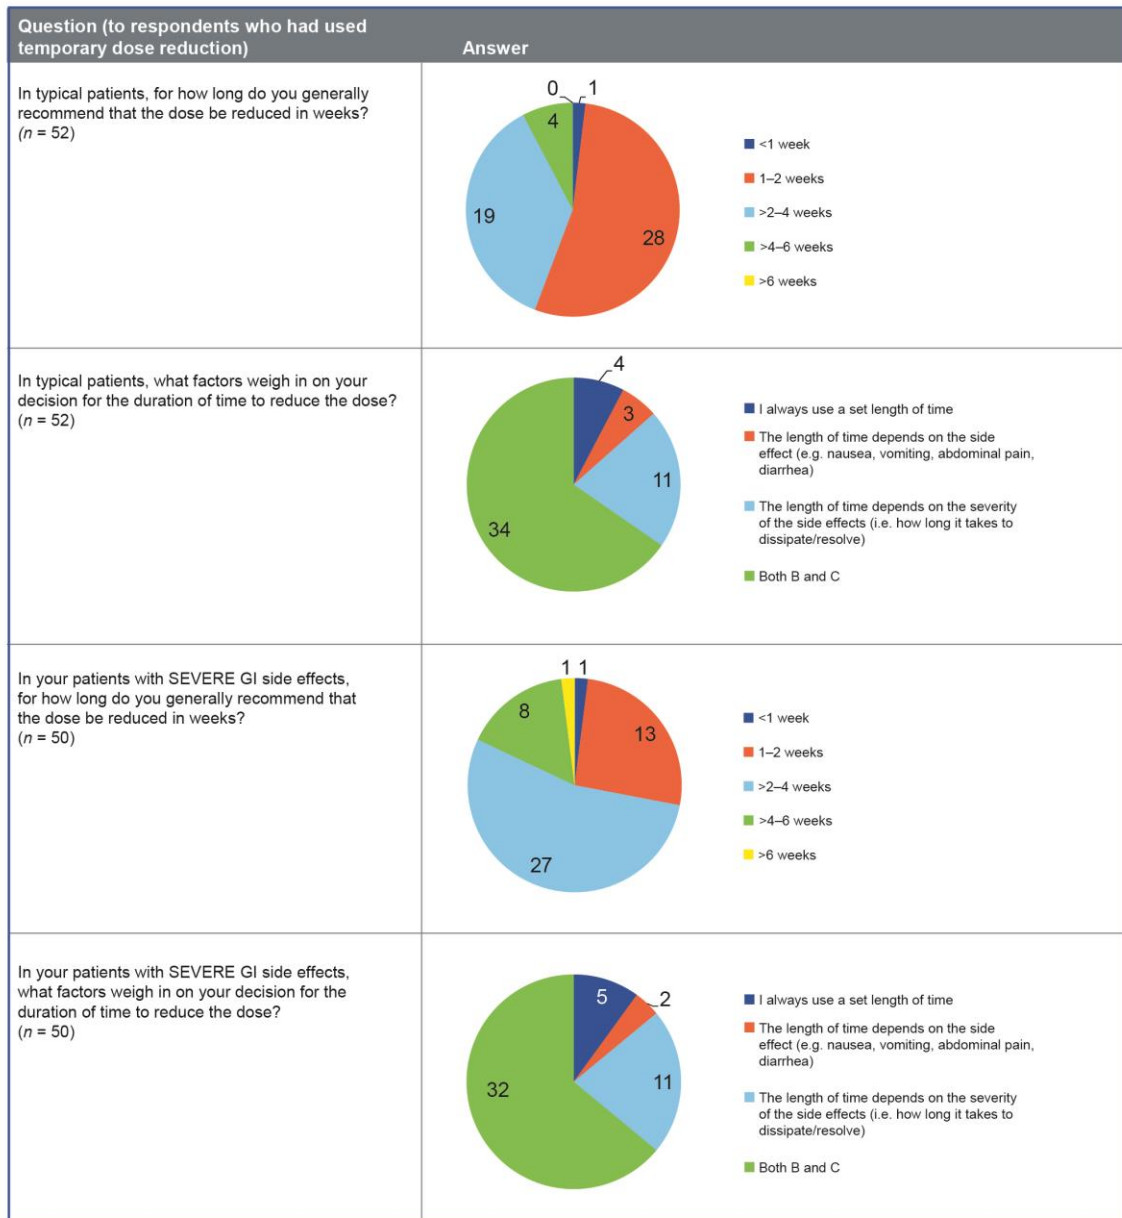

**Fig. S5 Symptomatic therapies that failed to reach consensus regarding their use in the management of each gastrointestinal adverse event. Dashed line at 70% demarcates the threshold required for consensus.**

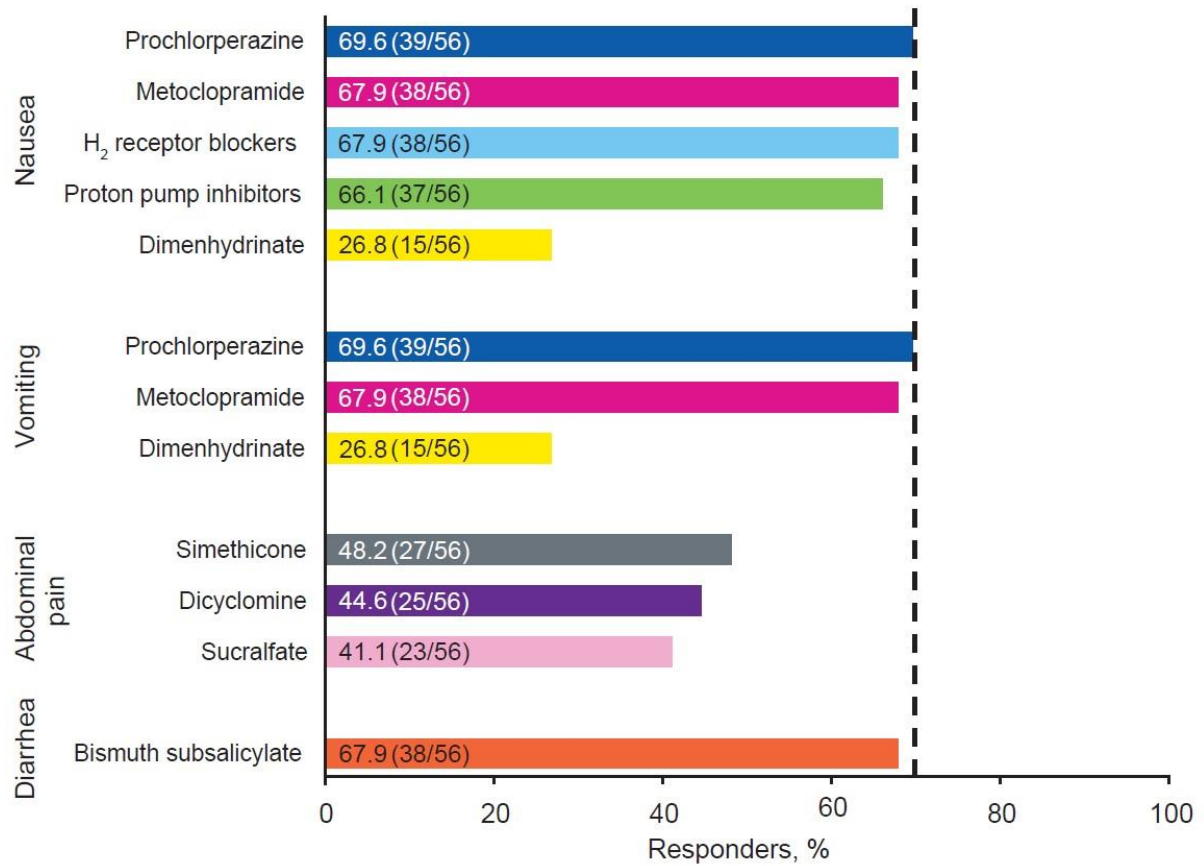

Supplement: MOESM1 [file 9339538]
